# Supplementary material
Source: PubMed Central journal article supplement (PMC10556225)
Supplement: mmc1.pdf [file mmc1.pdf]

## **Supplemental Information**

### **MicroRNA137-loaded lipid nanoparticles regulate synaptic proteins in the prefrontal cortex**

**Michelle C. Palumbo, Milan Gautam, Alex Sonneborn, Kilsun Kim, Phillip A. Wilmarth, Ashok P. Reddy, Xiao Shi, Daniel L. Marks, Gaurav Sahay, Atheir I. Abbas, and Aaron Janowsky**

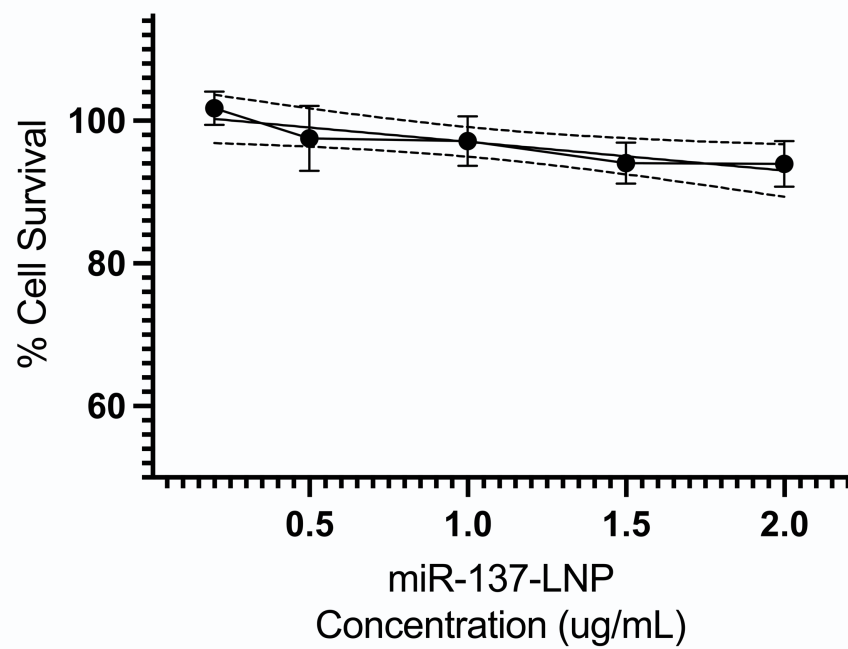

**Figure S1. Lipid nanoparticle toxicity *in vitro***  
MTT cell survival assay indicating minor toxicity after treatment with 0.5ug, 1ug, 1.5ug, or 2ug of miR137-LNPs in Neuro2A cell culture. n = 6, mean ± SEM

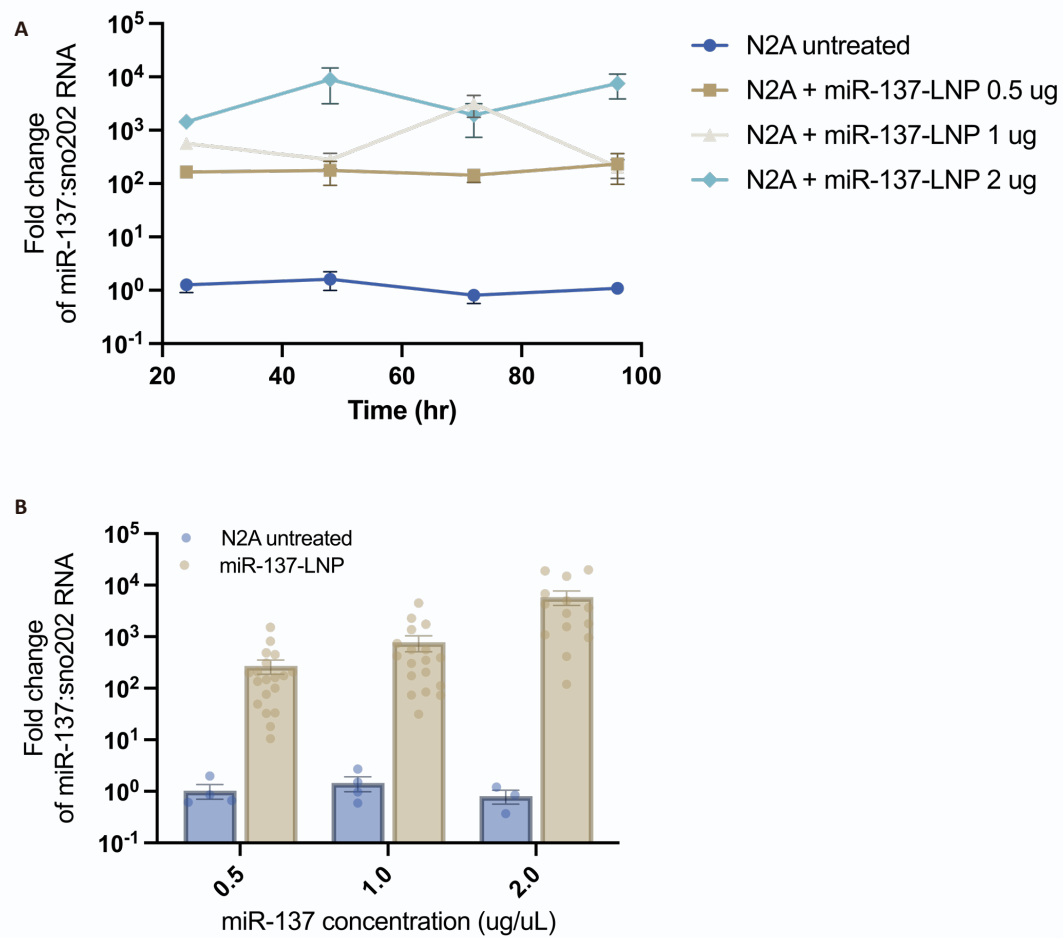

**Figure S2. Lipid nanoparticle concentration and time course in neuronal cell culture**  
**A)** Time course of RT-qPCR fold change miR-137 expression to sno202RNA after treatment with **B)** 0.5ug, 1ug, or 2ug of miR-137-LNPs in Neuro2A cell culture. n = 3-19, mean  $\pm$  SEM

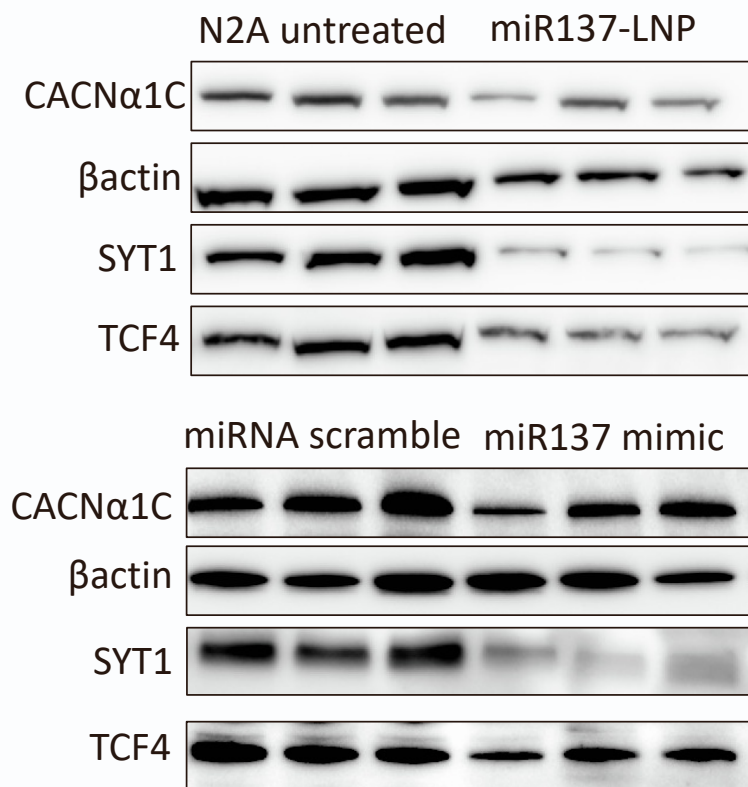

**Figure S3. Immunoblots of synaptic proteins by treatment**  
Representative western blot images showing relative protein levels of CACNA1C, βactin, SYT1, and TCF4 in untreated N2A cells or cells treated with miRNA scramble, miR137 mimic, or miR137-LNP. Data are quantified in Figure 2D.

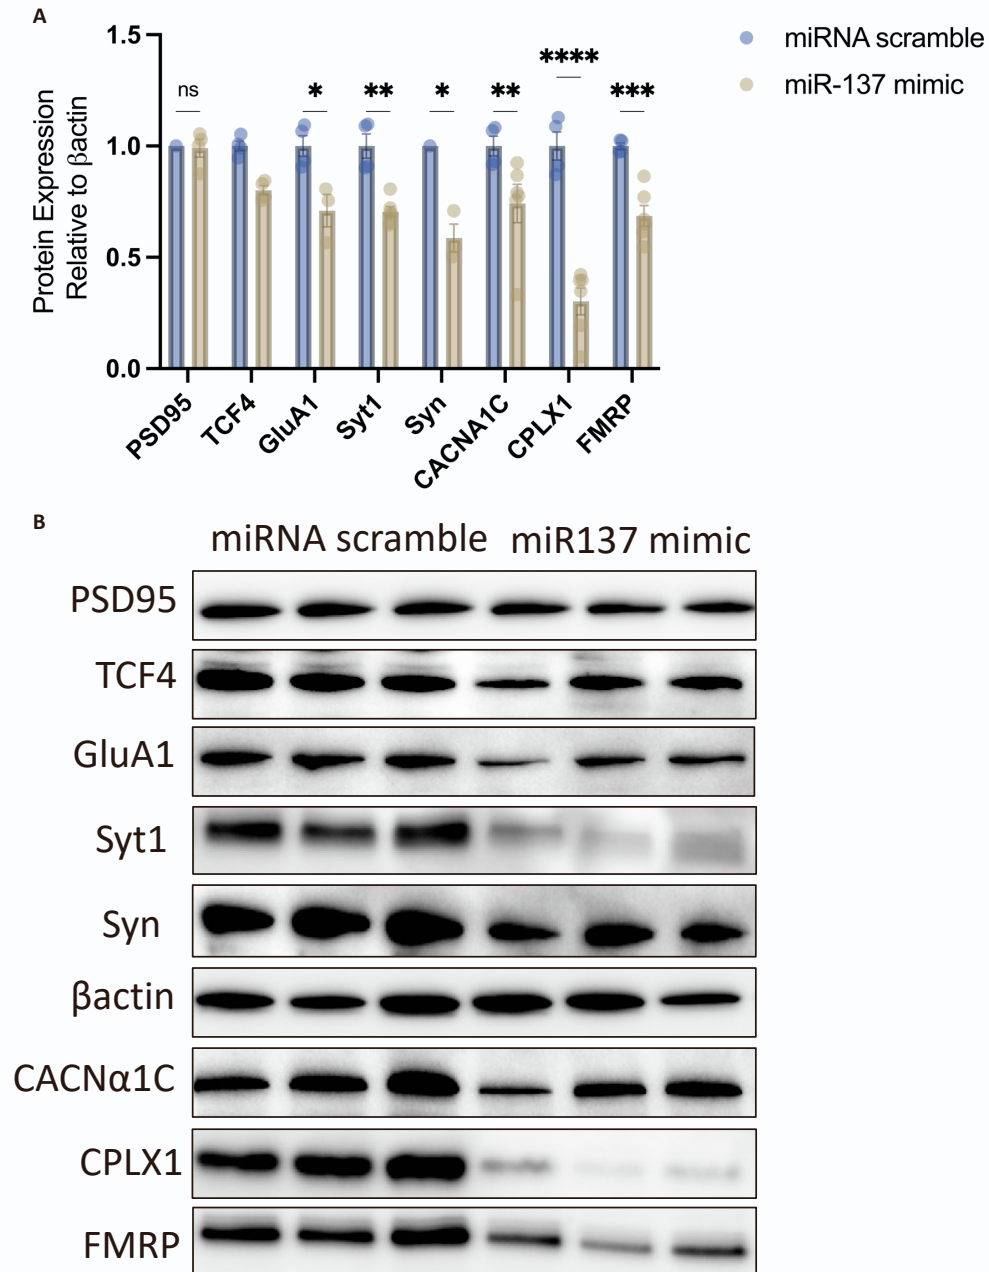

**Figure S4. miR137 synaptic protein inhibition**

**A)** Quantification and **B)** representative western blot images of treatment with miR137 mimic and miRNA scramble in N2A cells and relative expression of target synaptic proteins post synaptic density 95 (PSD95), transcription factor 4 (TCF4), glutamate receptor 1 (GluA1), synaptotagmin 1 (SYT1), synaptophysin (SYN), voltage gated calcium channel  $\alpha 1C$  (CACNA1C), complexin 1 (CPLX1), and fragile X mental retardation protein (FMRP). All protein levels are normalized to  $\beta$ actin in miRNA scramble.  $n = 3-6$ , mean  $\pm$  SEM; ns, not significant:  $p > 0.05$ ; \* $p < 0.05$ ; \*\* $p < 0.01$ ; \*\*\* $p < 0.001$  and \*\*\*\* $p < 0.0001$ .

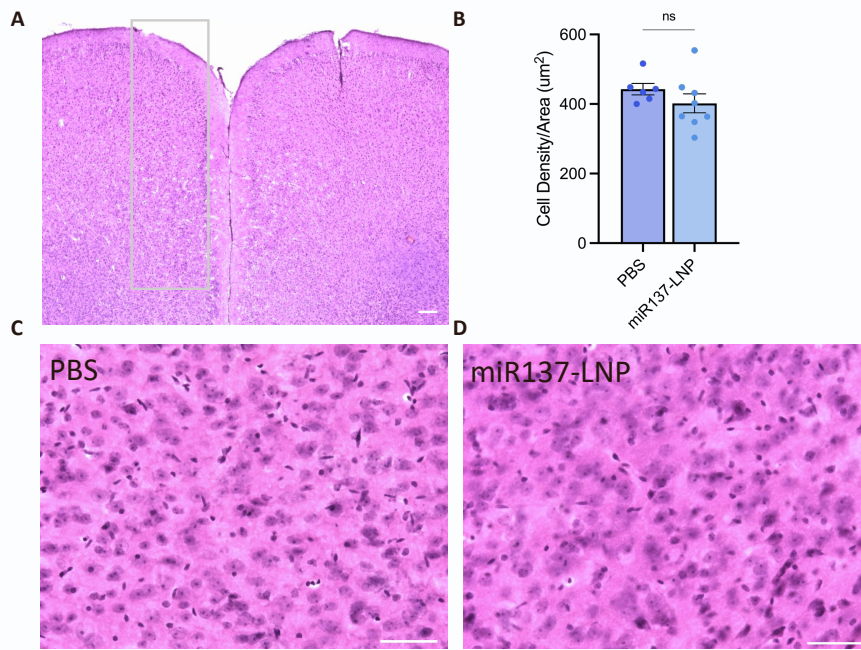

**Figure S5. Cellular lipid nanoparticle toxicity *in vivo***

H&E stain from **A)** mouse prefrontal cortex brain tissue. scale bar: 200 µm **B)** Quantification of neuronal cell density per section area (µm²) after 5 consecutive days of **C)** PBS or **D)** miR137-LNP treatments. scale bars: 100 µm. n = 2/treatment; mean ± SEM; ns, not significant

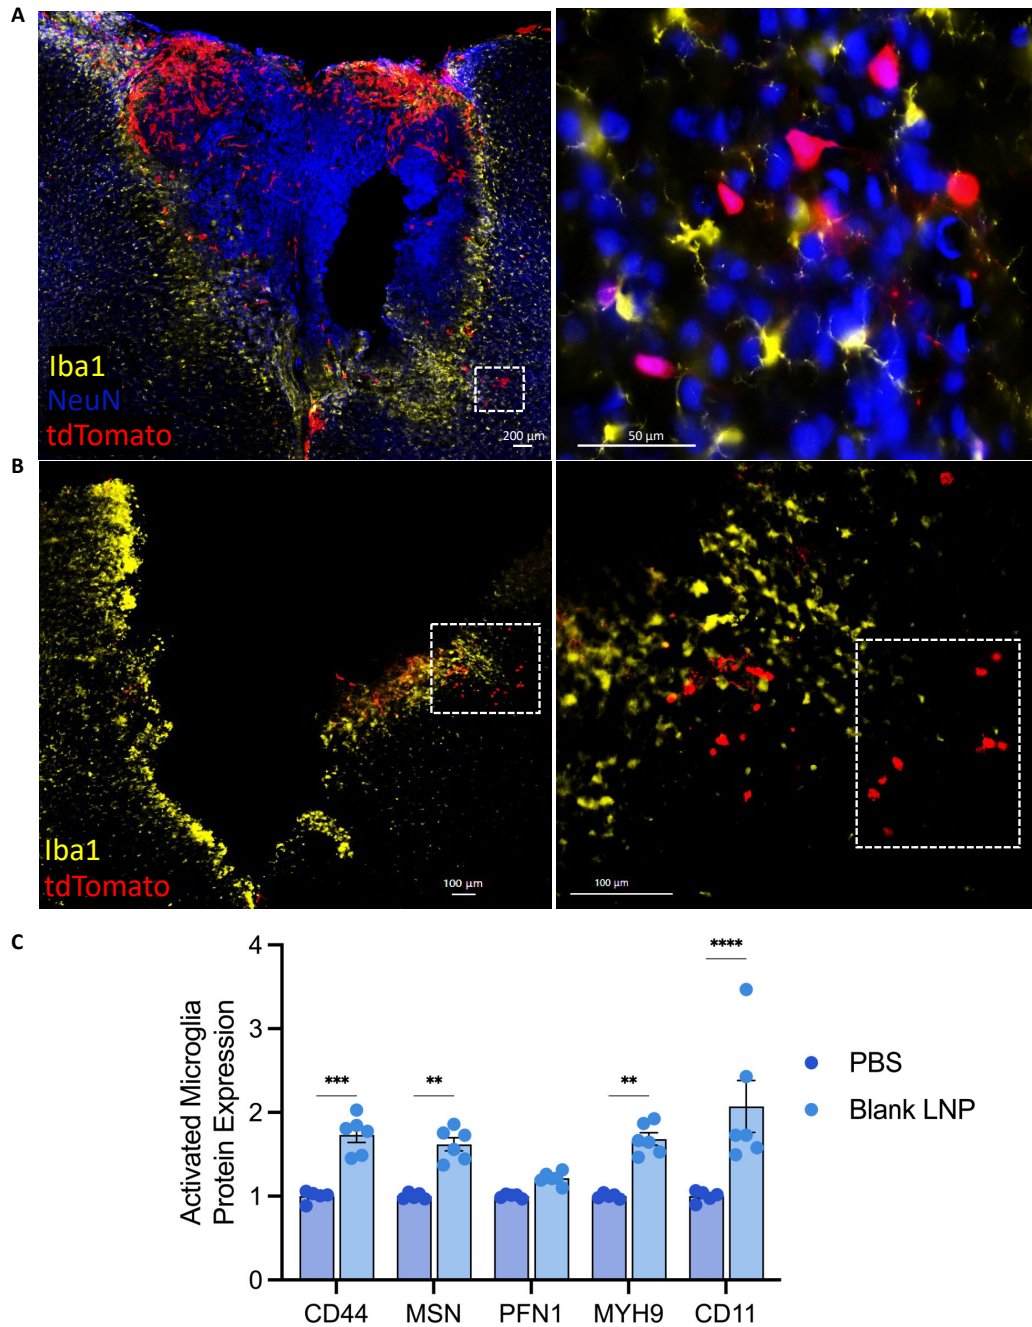

**Figure S6. Microglia Quantification and Activation**

Representative florescent images **A)** and **B)** of injection tract marks in the prefrontal cortex and adjacent quantified region (white box) for tdTomato (red), Iba1 (yellow), or NeuN (blue) co-labeling. **C)** Proteomic quantification of activated microglia protein expression comparing prefrontal cortex biopsies of animals who received PBS or blank LNPs: cluster of differentiation 44 (CD44), moesin (MSN), profilin 1 (PFN1), myosin heavy chain 9 (MYH9), and cluster of differentiation 11 (CD11) normalized to PBS. n = 5-6/group. mean  $\pm$  SEM; \*\* $p$  < 0.01, \*\*\* $p$  < 0.001 and \*\*\*\* $p$  < 0.0001.

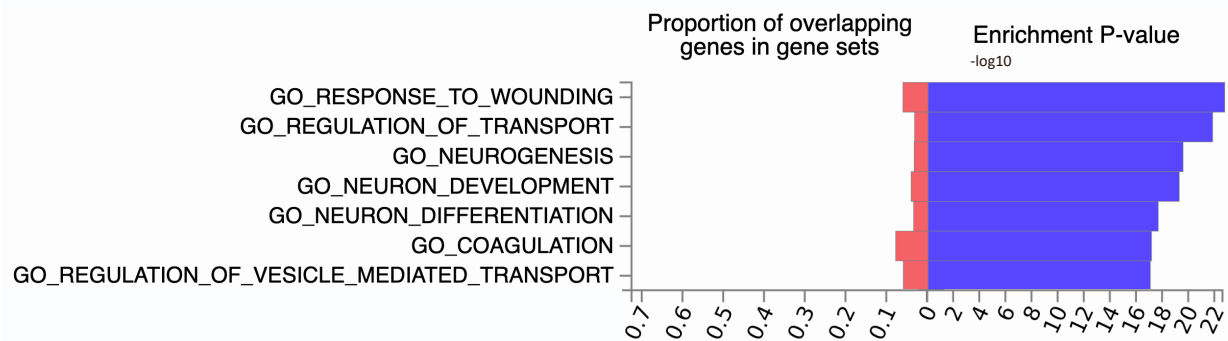

**Figure S7. miR137-LNP GO Biological Process**

Quantitative proteomics comparing prefrontal cortex biopsies of animals who received miR137-LNP or blank LNPs. GO biological process of enriched proteins from miR-137-LNPs involved in neuronal development. n = 5-6/group.

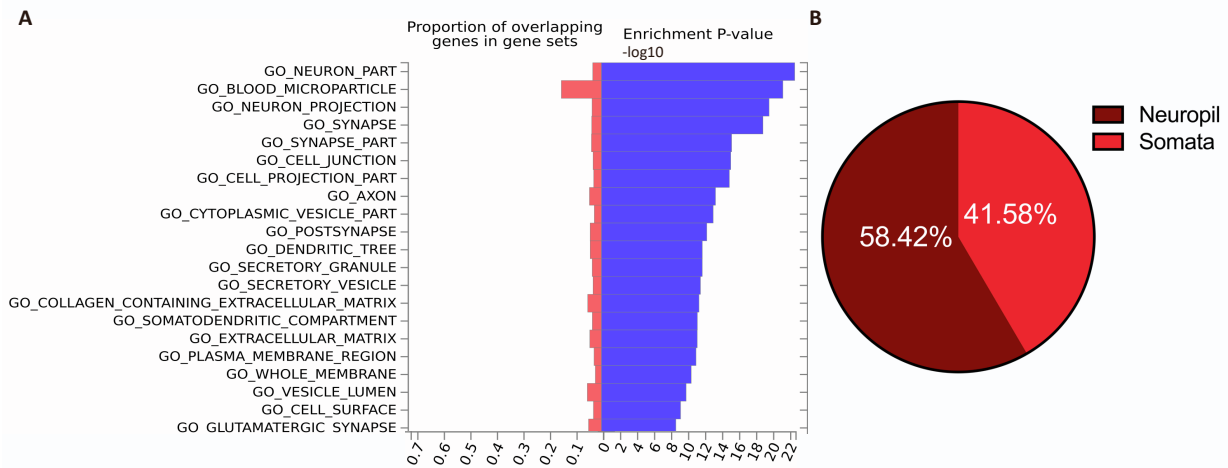

### Figure S8. miR137-LNP GO Cellular Compartment

Quantitative proteomics comparing prefrontal cortex biopsies of animals who received miR137-LNP or blank LNPs. **A)** GO cellular compartment of enriched proteins from miR-137-LNPs located in neuronal synapses. **B)** The majority of DEP miR137-LNP proteins are translated in the neuropil compared to the somata. n = 5-6/group.

**Table S1. Blank LNP Reactome pathway enrichment in the brain**

Differentially expressed proteins (DEP) comparing blank LNPs to PBS treatments. False discovery rate (FDR).

LNP Reactome Pathways

| GO-term     | Term description                               | % network activation | % total DEP | FDR      |
|-------------|------------------------------------------------|----------------------|-------------|----------|
| MMU-168256  | Immune system                                  | 17.95                | 19.14       | 2.92E-43 |
| MMU-76002   | Platelet activation, signaling and aggregation | 29.64                | 4.93        | 6.18E-20 |
| MMU-2262752 | Cellular responses to stress                   | 17.97                | 4.67        | 8.19E-10 |
| MMU-166658  | Complement cascade                             | 44.0                 | 1.45        | 1.91E-08 |
| MMU-1280215 | Cytokine signaling in immune system            | 16.54                | 4.14        | 1.12E-07 |

**Table S2. Blank LNP biological process enrichment in the brain**

Differentially expressed proteins (DEP) comparing blank LNPs to PBS treatments. False discovery rate (FDR).

LNP Biological Process

| GO-term    | Term description                 | % network activation | % total DEP | FDR      |
|------------|----------------------------------|----------------------|-------------|----------|
| GO:0033993 | Response to lipid                | 12.04                | 6.91        | 4.92E-06 |
| GO:0006629 | Lipid metabolic process          | 11.14                | 7.56        | 3.61E-05 |
| GO:0044255 | Cellular lipid metabolic process | 11.17                | 5.86        | 0.00042  |
| GO:0006869 | Lipid transport                  | 13.57                | 2.30        | 0.0049   |
| GO:0006644 | Phospholipid metabolic process   | 12.71                | 2.50        | 0.0081   |
